# Supplementary material for: Train-the-Trainers in hand hygiene: a standardized approach to guide education in infection prevention and control
Source: Springer Nature journal article supplement (doi:10.1186/s13756-019-0666-4), 2019-12-01

# COURSE FACULTY:

## CHAIR

- **Prof Didier Pittet:** Director - Infection Control Programme & WHO Collaborating Centre on Patient Safety, Geneva

## COURSE ORGANIZERS AND FACULTY

- **Dr Daniela Pires:** Medical doctor - Infection Control Programme & WHO Collaborating Centre on Patient Safety, Geneva
- **Ermira Tartari:** Infection Control Practitioner and Research Fellow - Infection Control Programme & WHO Collaborating Centre on Patient Safety, Geneva
- **Carolina Fankhauser-Rodriguez:** Microbiologist - Infection Control Programme & WHO Collaborating Centre on Patient Safety, Geneva

## FACULTY

- **Americo Agostinho:** Infection control nurse - Infection Control Programme & WHO Collaborating Centre on Patient Safety, Geneva
- **Josiane Sztajzel-Boissard:** Infection control nurse - Infection Control Programme & WHO Collaborating Centre on Patient Safety, Geneva
- **Dr Sarah Masson-Roy:** Medical doctor - Infection Control Programme & WHO Collaborating Centre on Patient Safety, Geneva
- **Dr Fernando Bellissimo Rodrigues:** Medical doctor - Professor of the Social Medicine Department, Ribeirão Preto Medical School, University of São Paulo,
- **Dr Marcela Hernández de Mezerville:** Coordinator, Epidemiology and Infection Prevention and Control Unit - Hospital Nacional de Niños, Costa Rica

# COURSE OVERVIEW:

The aim of a Train the Trainers (TTT) course is to set the global standard for training infection prevention and control (IPC) practitioners in hand hygiene.

These key actors establish their institution's hand hygiene infrastructure, lead hand hygiene improvement activities and spearhead scientific research agendas. However, there is widespread variation among the requisite elements of competence in hand hygiene worldwide. The Infection Control Programme and WHO Collaborating Centre on Patient Safety at the University of Geneva Hospitals and Faculty of Medicine, launched a TTT program for advanced and senior IPC practitioners, based on the WHO multimodal improvement strategy, which has been shown to have a measurable positive impact on participants' knowledge. This model sets the stage for standardized training of IPC practitioners worldwide.

The course is organised over 3 days and uses an interactive and multifaceted approach to learning. It uses a combination of group discussion, simulation of clinical scenarios and role-playing with immediate performance feedback. The simulation-based learning in this course allows participants to master the direct observation method for hand hygiene compliance, which is considered the gold standard for evaluation.

Participants' knowledge is assessed through a before-and-after course evaluation tool. This model serves as a reference training method for IPC practitioners and health workers worldwide. Integrate our TTT for hand hygiene into your IPC program to see measurable improvement in your healthcare facility.

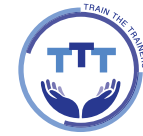

TRAIN THE TRAINERS

# HAND HYGIENE

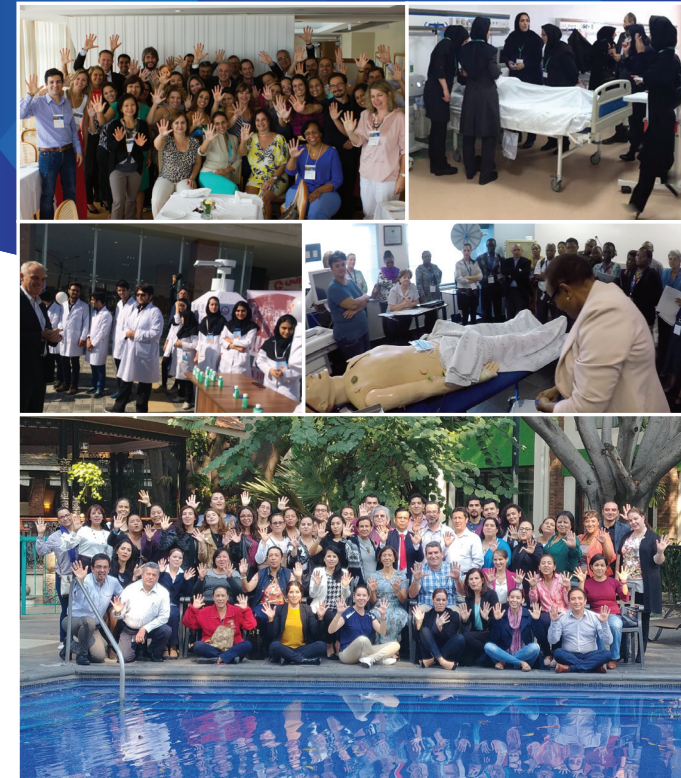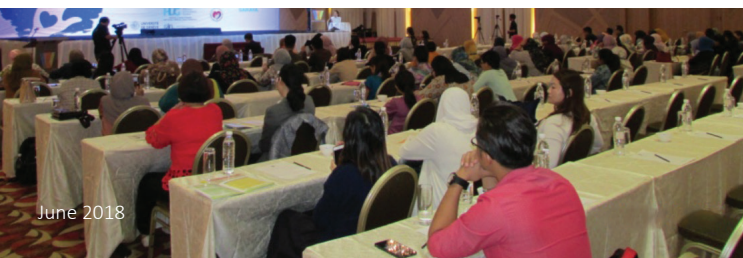

June 2018

More info and videos at: [CleanHandsSaveLives.org](https://CleanHandsSaveLives.org)

HUG  
Hôpitaux  
Universitaires  
Genève

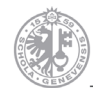

UNIVERSITÉ  
DE GENÈVE  
FACULTÉ DE MÉDECINE

# COURSE PROGRAMME:

## DAY 1

**09:00** Registration

**09:30** Welcome and introduction to the TTT concept

*Chair: Professor Didier Pittet*

**10:00** Pre-course evaluation questionnaire

**10:45** **COFFEE BREAK**

**11:15** Global Burden of Health Care-Associated Infections

**12:00** The start of Hand Hygiene promotion in Geneva and going Global – the story behind the success

**13:00** **LUNCH**

**14:00** WHO Multimodal Hand Hygiene Improvement Strategy

**14:45** “My 5 moments for Hand Hygiene” direct monitoring

**16:00** **COFFEE BREAK**

**16:30** “My 5 moments for Hand Hygiene” with practical application in clinical scenarios and group discussion (based on audio-visual tools and video reviewing)

**18:00** **WRAP-UP OF THE DAY**

## DAY 2

**09:00** WHO Hand Hygiene Self- Assessment Framework

How to complete the HHSAF?

**11:00** **COFFEE BREAK**

**11:30** How to challenge the campaign fatigue? Innovations in Hand Hygiene promotion worldwide

**12:30** **LUNCH**

**13:30** Simulation based clinical scenarios  
Bedside teaching with simulated patients, with role-play performance in groups

**15:30** **COFFEE BREAK**

**16:00** Simulation based clinical scenarios  
Bedside teaching with simulated patients, with role-play performance in groups

**18:00** **WRAP-UP OF THE DAY**

## DAY 3

**09:00** What’s new in Hand Hygiene?

**10:00** Action plan World café - building a hand hygiene action plan: working in groups

**11:00** **COFFEE BREAK**

**11:30** Experiences and challenges in Hand Hygiene

*Participants’ presentations and discussion*

**13:00** **LUNCH**

**14:30** Post-course evaluation questionnaire

**15:30** **COFFEE BREAK**

**16:00** Certificate giving ceremony

**17:00** **WRAP-UP AND COURSE EVALUATION**

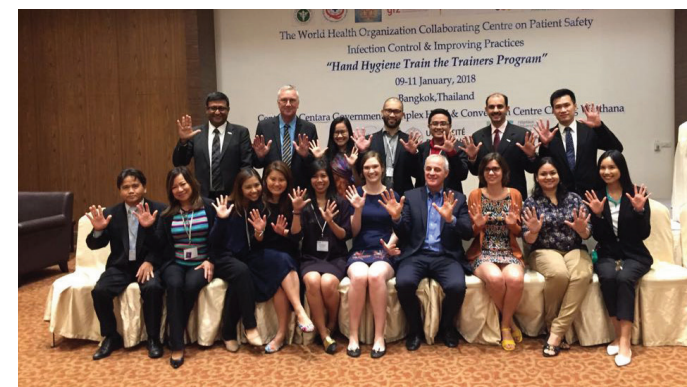

Supplement: MOESM1 [file 17614478]
